# Supplementary material
Source: PubMed Central journal article supplement (PMC5833605)
Supplement: jamaophthalmol-136-29-s002.pdf [file jamaophthalmol-136-29-s002.pdf]

## Supplementary Online Content

Maturi RK, Glassman AR, Liu D, et al; DRCR Network. Effect of adding dexamethasone to continued ranibizumab treatment in patients with persistent diabetic macular edema: a Diabetic Retinopathy Clinical Research Network phase 2 randomized clinical trial. *JAMA Ophthalmol*. Published online November 11, 2017. doi:10.1001/jamaophthalmol.2017.4914

**eAppendix 1.** Study Sites

**eAppendix 2.** Institutional Review Boards

**eTable 1.** Eligibility Criteria

**eTable 2.** Per-Protocol Analysis of Visual Acuity and Retinal Thickness

**eTable 3.** Pre-Planned Subgroup Analysis of Visual Acuity and Retinal Thickness

**eTable 4.** Post Hoc Subgroup Analysis of Visual Acuity

**eTable 5.** Ocular Adverse Events During Randomization Phase

**eTable 6.** Systemic Adverse Events During Randomization Phase

**eTable 7.** All Adverse Events During Randomization Phase by MedDRA System Organ Class

**eFigure 1.** Visual Acuity at 24 Weeks by Treatment Group Assignment

**eFigure 2.** Mean Change in Visual Acuity by Baseline Lens Status

**eFigure 3.** Mean Change in Visual Acuity by Improvement in Visual Acuity During Run-in Phase

**eFigure 4.** Mean Change in Visual Acuity by Improvement in Central Subfield Thickness During Run-in Phase

**eFigure 5.** Mean Change in Central Subfield Thickness by Baseline Lens Status

**eFigure 6.** Mean Change in Central Subfield Thickness by Improvement in Visual Acuity During Run-in Phase

**eFigure 7.** Mean Change in Central Subfield Thickness by Improvement in Central Subfield Thickness During Run-in Phase

This supplementary material has been provided by the authors to give readers additional information about their work.

## Appendix 1. Study Sites

**Diabetic Retinopathy Clinical Research Network clinical sites that participated on this protocol:** Sites are listed in order by number of subjects enrolled into the study. The number of subjects enrolled is noted in parenthesis preceded by the site location and the site name. Personnel are listed as (I) for Study Investigator, (C) for Coordinator, (V) Visual Acuity Technician, and (P) for Photographer.

### **Charlotte, NC Charlotte Eye, Ear, Nose and Throat Assoc., PA (19):**

David Browning(I); Omar S. Punjabi(I); Andrew N. Antoszyk(I); Angela K. Price (C,V); Jenna T. Herby (C,V); Taylor S. Jones (C,V); Sherry L. Fredenberg (C,V); Courtney Mahr (C,V); Christina J. Fleming (C,V); Sarah A. Ennis(V); Erica Breglio(V); Angella S. Karow(V); Lisa A. Jackson(P); Uma M. Balasubramaniam(P); Swann J Bojaj(P); Donna McClain(P); Lynn Watson(P); Loraine M. Clark(P); Kathryn Kimrey(P); Jeff A. Kuopus(P); Carol A Simchik(P); Beverly O Rowland(P); Autumn K. Finch(P); Michael D. McOwen(P) **Huntington Beach, CA**

**Atlantis Eye Care (18):** Hani Salehi-Had(I); Sara Ahmed(C); Amy L. Khodai(C); Stephanie Ramirez (C,V); Michael J. Mireles(C); Mary Ma(V); Scott F. Lee(V); Monica J. Rivero(P); Lily Castillo(P) **Indianapolis, IN Raj K. Maturi, M.D., P.C. (18):** Raj K. Maturi(I); Ashley M. Harless (C,V); Carolee K. Novak(V); Nicole Ellingwood(P); Lorraine White(P); Alisha Ware(P)

**Houston, TX Baylor Eye Physicians and Surgeons (16):** Christina Y. Weng(I); Robert E. Coffee(I); Petros Euthymiou Carvounis(I); Wendy Blacutt(C); Margaret M. Olfson(C); Karri Schuetzle(C); Pejman Hemati (C,V); April Leger(V); Dana B. Barnett(P); Joseph F.

Morales(P) **Minneapolis, MN Retina Center, PA (16):** Abdhish R. Bhavsar(I); Jacob M. Jones(I); Geoffrey G. Emerson(I); Joan Dupont (C); Andrea Gilchrist(C); Dave A. Crannick(C); Gaid Gaid(V); Erin C. Kinney(V,P); Hannah N. Schoenecker(P); Alanna C. Evans(V,P); Nora Gould(V); Tonja Scherer(P,V); Denise Vang(P) **Fort Myers, FL National Ophthalmic**

**Research Institute (9):** A. Thomas Ghuman(I); Ashish G. Sharma(I); Paul A. Raskauskas(I); Eileen Knips(C); Cheryl Ryan(C); Cheryl Kiesel(C); Crystal Y. Peters(C); Laura Greenhoe(C); Natalie N. Torres(C); Anita H. Leslie(V); Danielle Dyshanowitz(V); Raymond K. Kiesel(P) **Portland, OR Casey Eye Institute (8):** Steven T. Bailey(I); Christina J Flaxel(I);

Thomas S. Hwang(I); Andreas K. Lauer(I); Mitchell Schain (C,V); Shelley A. Hanel(C); Ann D. Lundquist (C,V); Susan K. Nolte(V); Shirley D. Ira(V); Dawn M. Ryan(P); Scott R. Pickell(P);

Peter N. Steinkamp(P); Jordan Barth(P); Chiedozie Ukachukwu(P); Jocelyn T. Hui(P); Chris S Howell(P) **Santa Barbara, CA California Retina Consultants (7):** Dilsher Dhoot(I); Alessandro A. Castellarin(I); Dante J. Pieramici(I); Gina Hong (C,V); Sara Esau (C,V); Erica D. Morasse (C,V); Jack Giust(C); Sarah Fishbein (C,V); Michelle S. Hanna (C,V); Kelly Avery(V); Jerry Smith(V); Aimee Walker(P) **Lakeland, FL Florida Retina Consultants (6):** Scott M. Friedman(I); Nader Moinfar(I); Damanda F. Fagan (C,V); Kimberly A. Williamson (C,V); Katrina L. Dawson(C); Paige N. Walters(P,V); Allen McKinney(P,V) **Augusta, GA Southeast Retina Center, P.C. (5):** Dennis M. Marcus(I); Harinderjit Singh(I); Siobhan O. Ortiz(C); Michele Woodward(C); Amina Farooq(C); Lindsay Allison Foster(P,V); Thomas Bailey(V); Ken Ivey(P) **Baltimore, MD Elman Retina Group, P.A. (5):** Michael J. Elman(I); Henry A. Leder(I); JoAnn Starr(C); Jennifer L. Belz(C); Twyla J Robinson(C); Pamela V. Singletary(V); Amy Thompson(V); Dallas R. Sandler(P,V); Jennifer L. Simmons(V); Perel M. Simpson(V); Teresa Coffey(V); Terri Cain(P); Ashley M. Metzger(P); Peter Sotirakos(P) **Beverly Hills, CA Retina-Vitreous Associates Medical Group (5):** Roger L. Novack(I); David S. Liao(I); Daniel D. Esmaili(I); Kelly Hu(C); Lynn Pham(C); Tammy Eileen Lo(C); Julio Sierra(V); Adam Zamboni(V); Eric G. Protacio(P); Josh Koo(P) **San Antonio, TX Retinal Consultants of San Antonio (5):** Moises A. Chica(I); Calvin E. Mein(I); Lita Kirschbaum(C); Tori R. Moore (C,V); Jaynee Baker(C); Christopher Sean Wienecke(P,V); Clarissa M. Marquez(P); Brenda Nakoski(P); Elaine Castillo(V) **Dubuque, IA Medical Associates Clinic, P.C. (4):** Michael H. Scott(I); Shannon R. Walsh(C); Marcia J. Moyle(P,V); Brenda L. Tebon(P,V) **GRAND RAPIDS, MI Retina Specialists of Michigan (4):** Thomas M. Aaberg(I); Scott J. Westhouse(I); Holly L. Vincent (C,V); Kyle Brandt(C); Kathy L. Karsten(P,V); Shymaa Mohamed(P,V) **Loma Linda, CA Loma Linda University Health Care, Department of Ophthalmology (4):** Joseph T. Fan(I); Lynn L. Huang(I); Michael E. Rauser(I); Liel Marvyn Cerdenio (C,V); Raquel Hernandez (C,V); William H. Kiernan(V); Jesse Knabb(P); Armand Assissini(P) **Seattle, WA University of Washington Medical Center (4):** James L. Kinyoun(I); Gurunadh Atmaram Vemulakonda(I); Kasra Attaran Rezaei(I); Ian P Luttrell(C); Susan A. Rath (C,V); Francly Moses(V); Juli A. Pettingill(V); Brad C. Clifton(P); Ronald C. Jones(P); James D. Leslie(P) **Beachwood, OH Retina Associates of Cleveland, Inc. (3):** Lawrence J. Singerman(I); Joseph M. Coney(I); Jerome P. Schartman(I); David G. Miller(I); Michael A. Novak(I); Susan C. Rath(C); Veronica A. Smith(C); Cecelia Rykena(V); Mary A

llc(V); Tia R Drugan(V); Vivian Tanner(V); Kimberly A. DuBois(V); Gregg A. Greanoff(P); John C. DuBois(P); Elizabeth McNamara(P); William B. Amonett(P) **Knoxville, TN Southeastern Retina Associates, P.C. (3)**: Joseph M. Googe(I); R. Keith Shuler(I); Nicholas G. Anderson(I); Kristina Oliver(C); Steve Morris(C); Kathy L. Schulz(V); Julie Rauen(V); Jerry K. Whetstone(P); Justin Walsh(V); Sarah M. Oelrich(P); Raul E. Lince(P) **Lubbock, TX Texas Retina Associates (3)**: Michel Shami(I); Yolanda Saldivar(C); Brenda K. Arrington(C); Ashaki Meeks(V); Kayla Blair(P); Ginger K. Rhymes(P); Glenn R Gardner(P) **NEW LONDON, CT Retina Group of New England (3)**: Nauman A. Chaudhry(I); Emiliya German(C); Alison Fontecchio(V); Heather Casey(V); Justin A. Cocilo(P) **New York, NY MaculaCare (3)**: Daniel F. Rosberger(I); Phuntsho Wangmo(C); Sandra Groeschel(C); Sandra Acevedo(V); Yenelda M. Gomez(P,V); Robert Santora(P) **ROCHESTER, NY University of Rochester (3)**: David Allen DiLoreto(I); George W. O'Gara(C); Andrea M. Czubinski (C,V); Rebecca K. Gerhart(V); Patricia A. Artman(P); Taylor A. Pannell(P); Brittany S. Richardson(P); Rachel Hollar(P) **Sarasota, FL Sarasota Retina Institute (3)**: Melvin Chen(I); Waldemar Torres(I); Peggy A. Jelemensky(C); Tara L. Raphael(V); Mark Sneath(P); Rosa Miller(V); Jim Sherry(P) **Amarillo, TX Southwest Retina Specialists (2)**: Ryan B. Rush(I); Glenn R. Gardner(C); Johnathan R. Hawkins(V); Ben Ysasaga(P) **Austin, TX Retina Research Center (2)**: Brian B. Berger(I); Saradha Chexal(I); Chirag D. Jhaveri(I); Ryan M. Reid(C); Ivana Gunderson (C,V); Tina A Seidu(C); Boris Corak(P,V); Yong Ren(P) **Boston, MA Joslin Diabetes Center (2)**: Paolo S. Silva(I); Corey Westerfeld(I); Christopher Michael Andreoli(I); Jennifer K. Sun(I); Margaret E. Stockman (C,V); Flor M. Flores (C,V); Linette Miranda (C,V); Troy Kieser (C,V); Jerry D. Cavallerano(V); Elizabeth S. Weimann(P); Rita K. Kirby(P); Steve L. Papaconstantinou(P); Kate A. Palitsch(P); Kylie M. Madigan(P); Robert W. Cavicchi(P) **Houston, TX Retina and Vitreous of Texas (2)**: Joseph A. Khawly(I); Emmanuel Chang(I); Diana Abdelgani(C); Erica Pineda(V); Debbie Fredrickson(V); Donald K. Lowd(P); Desiree Lopez(P); Jason E. Muniz(P); Colin Blank(P) **Houston, TX Retina Consultants of Houston, PA (2)**: Charles C. Wykoff(I); Richard H. Fish(I); David M. Brown(I); James C. Major(I); Tien P. Wong(I); Matthew S. Benz(I); Amy Hutson(C); Jolene Carranza(C); Lauren Epp(C); Meredith Berry(C); Nubia Landaverde(C); Veronica A. Sneed(V); Belinda A. Almanza(V); Rebecca Yee(V); Beau A Richter(P); Eric N. Kegley(P) **Jacksonville, FL University of Florida College of Med., Department of Ophthalmology, Jacksonville Health Science Cent (2)**: Sandeep

Grover(I); Kakarla V. Chalam(I); Ghulam Shabbir Hamdani(C); Zimei Zhou (C,V); Kumar Sambhav (C,V) **Mountain View, CA Northern California Retina Vitreous Associates (2):** Rahul N. Khurana(I); Diana Lam(C); Amy Dennis(C); Andrea Gadda(V) **Philadelphia, PA University of Pennsylvania Scheie Eye Institute (2):** Alexander J. Brucker(I); Sheri Drossner (C,V); Jim M. Berger(P); Sara Morales(P) **Portland, OR Retina Northwest, PC (2):** Mark A. Peters(I); Stephanie L. Ho (C,V); Stephen Hobbs (C,V); Amanda C. Milliron(V); Marcia Kopfer(V) **Redlands, CA Retina Consultants of Southern California (2):** Richard D. Pesavento(I); Jacque' Smith(C); Tina Ramirez(P); Jordan Davis(V) **Richmond, VA Retina Institute of Virginia (2):** John Stewart O'Keefe(I); Bryan J. Schwent(I); Suzette A. Rosen(C); Melissa A. Tutka(V); Natalie J. Arndt(V); John J. Maziarz(P) **Saint Louis, MO The Retina Institute (2):** Kevin J. Blinder(I); Thomas K. Krummenacher(I); Erika A. Hoehn(C); Maria A. Stuart(V); Diana Reardon(V); George Guevara(P); Jarrod Wehmeier(P); Steve A Schremp(P); Timothy L Wright(P) **Austin, TX Austin Retina Associates (1):** Robert W. Wong(I); Peter A. Nixon(I); Phillip V. Le (C,V); Carrie E. Leung(C); Chris A. Montesclaros(C); Jeni L. Leon(C); Codey L. Daus(P) **Sacramento, CA Retinal Consultants Medical Group, Inc. (1):** Margaret A. Chang(I); John Brian Reed(I); Kimberlee S. Wong(C); Eric Bair(V) **Salt Lake City, UT Retina Associates of Utah, P.C. (1):** Robert C. Kwun(I); Kirk E. Winward(I); Victoria L. Knudsen(I); Michelle Riley(C); Shauna Ma(C); Teresa Taylor(V); Jason G. Winward(P,V) **Warrenton, VA Virginia Retina Center (1):** Sam E. Mansour(I); Cathy Choyce (C,V); Aissa L. Dirawatun(V,P); Ana Mills(P)

**DRCR.net Coordinating Center: Jaeb Center for Health Research, Tampa, FL** (staff as of 9/22/2017): Adam R. Glassman (Director and Principal Investigator), Roy W. Beck (Executive Director), Daphne Auza, Alyssa Baptista, Wesley T. Beaulieu, Sharon R. Constantine, Brian B. Dale, Simone S. Dupre, Julie Hay, Meagan L. Huggins, Paula A. Johnson, Brittany Kelly, Danni Liu, Brenda L. Loggins, Shannon L. McClellan, Michele Melia, Isoken Odia, Carrie Preston, Cynthia R. Stockdale, Danielle Stanley

**DRCR.net Network Chair:** Lee M. Jampol (2013-present), Neil M. Bressler (2006-2012)

**DRCR.net Vice Chairs:** Carl W. Baker (2011-2013, 2017-present), Chirag Jhaveri (2016 – present), Judy Kim (2015-present), Andrew Antoszyk (2013-2016), Jennifer K. Sun (2012-2014), John A. Wells, III (2013- 2015).

**National Eye Institute:** Sangeeta Bhargava (2016-current) Eleanor Schron (2009-2015)

**Data Safety and Monitoring Committee:** Gary Abrams, Deborah R. Barnbaum, Harry Flynn, Kyle D. Rudser, Sangeeta Bhargava, Ruth S. Weinstock, Charles P. Wilkinson, Stephen Wisniewski (Chair, 2016-current), John Connett (Chair, 2003-2015)

**Executive Committee:** Lloyd Paul Aiello (2002-present; Chair 2002 – 2005), Andrew N. Antoszyk (2009; 2013 - present), Carl W. Baker (2009-present), Roy W. Beck (2002-present), Sangeeta Bhargava (2016-present), Barbra Blodi (2014-present), Neil M. Bressler (2006-present; Chair 2006 - 2008), Susan B. Bressler (2009-Present), Matthew D. Davis (2002-present), Michael J. Elman (2006-present; Chair 2009 and 2012), Frederick L. Ferris III (2002-present), Adam R. Glassman (2005-present), Jeffrey G. Gross (2012-present), Glenn J. Jaffe (2012-present), Lee M. Jampol (2012-present; Chair 2013-present), Chirag D. Jhaveri (2016-present), Judy E. Kim (2015-present), Brandon Lujan (2017-present), Dan Martin (2017-present), Raj K. Maturi (2009-2011, 2013- present), Jennifer K. Sun (2009-present). Prior Members: Eleanor Schron (2009-2015) John A. Wells, III (2012-2015).

## **Appendix 2. Institutional Review Boards**

- Jaeb Center for Health Research IRB
- Joslin Diabetes Center IRB
- University of Washington Medical Center IRB
- University of Pennsylvania Scheie Eye Institute IRB
- Casey Eye Institute IRB
- Loma Linda University Health Care, Department of Ophthalmology IRB
- University of Rochester IRB
- University of Florida College of Med., Department of Ophthalmology, Jacksonville Health Science Center IRB
- Baylor Eye Physicians and Surgeons IRB



**eTable 1. Eligibility Criteria**

| <b>Run-in Phase</b> |                                                                                                                                                                                                                                                                                                                                                                                                                                                                                                                                                                                                                                                                                                                                                                                                                                                                                                                                                                                                                                                                                                                                                                                                                                                                                                                                                                                                                                                                                                                                                                                                                                                                                                                                                                                                                                                                                                |
|---------------------|------------------------------------------------------------------------------------------------------------------------------------------------------------------------------------------------------------------------------------------------------------------------------------------------------------------------------------------------------------------------------------------------------------------------------------------------------------------------------------------------------------------------------------------------------------------------------------------------------------------------------------------------------------------------------------------------------------------------------------------------------------------------------------------------------------------------------------------------------------------------------------------------------------------------------------------------------------------------------------------------------------------------------------------------------------------------------------------------------------------------------------------------------------------------------------------------------------------------------------------------------------------------------------------------------------------------------------------------------------------------------------------------------------------------------------------------------------------------------------------------------------------------------------------------------------------------------------------------------------------------------------------------------------------------------------------------------------------------------------------------------------------------------------------------------------------------------------------------------------------------------------------------|
| <b>Participants</b> |                                                                                                                                                                                                                                                                                                                                                                                                                                                                                                                                                                                                                                                                                                                                                                                                                                                                                                                                                                                                                                                                                                                                                                                                                                                                                                                                                                                                                                                                                                                                                                                                                                                                                                                                                                                                                                                                                                |
| <b>Inclusion</b>    | Age ≥ 18 years<br>Diagnosis of diabetes mellitus (type 1 or type 2)                                                                                                                                                                                                                                                                                                                                                                                                                                                                                                                                                                                                                                                                                                                                                                                                                                                                                                                                                                                                                                                                                                                                                                                                                                                                                                                                                                                                                                                                                                                                                                                                                                                                                                                                                                                                                            |
| <b>Exclusion</b>    | History of chronic renal failure requiring dialysis or kidney transplant<br>A condition that, in the opinion of the investigator, would preclude participation in the study (e.g., unstable medical status including blood pressure, cardiovascular disease, and glycemic control)<br>Initiation of intensive insulin treatment (a pump or multiple daily injections) within 4 months prior to randomization or plans to do so in the next 4 months<br>Participation in an investigational trial that involved treatment with any drug that has not received regulatory approval for the indication being studied within 30 days of enrollment<br>Known allergy to any component of the study drugs (including povidone iodine prep)<br>Blood pressure >180/110 (systolic above 180 OR diastolic above 110)<br>Myocardial infarction, other acute cardiac event requiring hospitalization, stroke, transient ischemic attack, or treatment for acute congestive heart failure within 1 month prior to enrollment<br>Systemic steroid, anti-vascular endothelial growth factor (VEGF) or pro-VEGF treatment within 4 months prior to enrollment or anticipated use during the study<br>For women of child-bearing potential: pregnant or lactating or intending to become pregnant within the next 9 months<br>Individual is expecting to move out of the area of the clinical center to an area not covered by another clinical center during the next 9 months                                                                                                                                                                                                                                                                                                                                                                                                                                |
| <b>Study Eye</b>    |                                                                                                                                                                                                                                                                                                                                                                                                                                                                                                                                                                                                                                                                                                                                                                                                                                                                                                                                                                                                                                                                                                                                                                                                                                                                                                                                                                                                                                                                                                                                                                                                                                                                                                                                                                                                                                                                                                |
| <b>Inclusion</b>    | At least 3 injections of anti-VEGF drug (ranibizumab, bevacizumab, or aflibercept) within the prior 20 weeks<br>Visual acuity letter score in study eye ≤78 and ≥24 (approximate Snellen equivalent 20/32 to 20/320)<br>On clinical exam, definite retinal thickening due to DME involving the center of the macula<br>OCT CSF thickness (microns), within 8 days of enrollment: Zeiss Cirrus: ≥290 in women, ≥305 in men; Heidelberg Spectralis: ≥305 in women, ≥320 in men<br>Media clarity, pupillary dilation, and individual cooperation sufficient for adequate OCTs                                                                                                                                                                                                                                                                                                                                                                                                                                                                                                                                                                                                                                                                                                                                                                                                                                                                                                                                                                                                                                                                                                                                                                                                                                                                                                                     |
| <b>Exclusion</b>    | Macular edema is considered to be due to a cause other than diabetic macular edema (DME)<br>An ocular condition is present such that, in the opinion of the investigator, visual acuity loss would not improve from resolution of macular edema (e.g., foveal atrophy, pigment abnormalities, dense subfoveal hard exudates, non-retinal condition, etc.)<br>An ocular condition is present (other than DME) that, in the opinion of the investigator, might affect macular edema or alter visual acuity during the course of the study (e.g., vein occlusion, uveitis or other ocular inflammatory disease, neovascular glaucoma, etc.)<br>Substantial lens or posterior capsule opacity that, in the opinion of the investigator, is likely to be decreasing visual acuity by 3 lines or more (i.e., opacity would be reducing acuity to 20/40 or worse if eye was otherwise normal)<br>History of intravitreal anti-VEGF drug within 21 days prior to enrollment<br>History of intravitreal or peribulbar corticosteroids within 3 months prior to enrollment<br>History of macular laser photocoagulation within 4 months prior to enrollment<br>History of panretinal (scatter) photocoagulation (PRP) within 4 months prior to enrollment or anticipated need for PRP in the 6 months following enrollment into run-in phase<br>Any history of vitrectomy<br>History of major ocular surgery (including scleral buckle, any intraocular surgery, etc.) within prior 4 months or anticipated within the next 6 months following enrollment<br>History of cataract extraction within 6 months prior to enrollment or anticipated need for cataract extraction within the study follow-up period<br>History of YAG capsulotomy performed within 2 months prior to enrollment<br>Exam evidence of external ocular infection, including conjunctivitis, chalazion, or substantial blepharitis |



|                                                     |                                                                                                                                                                                                                                                                                                                                                                                                                                                                                                                                                                                                                                                                                                                                                                                                                                                                                                                                                                                                                                                       |
|-----------------------------------------------------|-------------------------------------------------------------------------------------------------------------------------------------------------------------------------------------------------------------------------------------------------------------------------------------------------------------------------------------------------------------------------------------------------------------------------------------------------------------------------------------------------------------------------------------------------------------------------------------------------------------------------------------------------------------------------------------------------------------------------------------------------------------------------------------------------------------------------------------------------------------------------------------------------------------------------------------------------------------------------------------------------------------------------------------------------------|
|                                                     | <p>Intraocular pressure <math>\geq 25</math> mmHg</p> <p>History of open-angle glaucoma (either primary open-angle glaucoma or other cause of open-angle glaucoma; note: history of angle-closure glaucoma is not an exclusion criterion).</p> <p>History of steroid-induced intraocular pressure elevation that required intraocular pressure (IOP)-lowering treatment</p> <p>History of prior herpetic ocular infection</p> <p>Exam evidence of ocular toxoplasmosis</p> <p>Exam evidence of pseudoexfoliation or any other condition associated with zonular dehiscence or lens instability</p> <p>Aphakia</p> <p>Anterior-chamber intraocular lens present</p> <p>Sutured posterior-chamber intraocular lens with a ruptured posterior capsule present</p>                                                                                                                                                                                                                                                                                        |
| <b>Non-Study Eye (unilateral participants only)</b> |                                                                                                                                                                                                                                                                                                                                                                                                                                                                                                                                                                                                                                                                                                                                                                                                                                                                                                                                                                                                                                                       |
| <b>Inclusion</b>                                    | <p>IOP &lt; 25 mmHg</p> <p>No history of open-angle glaucoma (either primary open-angle glaucoma or other cause of open-angle glaucoma; note: angle-closure glaucoma is not an exclusion criterion)</p> <p>No history of steroid-induced IOP that required IOP-lowering treatment</p> <p>No exam evidence of pseudoexfoliation</p>                                                                                                                                                                                                                                                                                                                                                                                                                                                                                                                                                                                                                                                                                                                    |
| <b>Randomization Phase</b>                          |                                                                                                                                                                                                                                                                                                                                                                                                                                                                                                                                                                                                                                                                                                                                                                                                                                                                                                                                                                                                                                                       |
| <b>Study Eye</b>                                    |                                                                                                                                                                                                                                                                                                                                                                                                                                                                                                                                                                                                                                                                                                                                                                                                                                                                                                                                                                                                                                                       |
| <b>Inclusion</b>                                    | <p>All 3 run-in phase visits and ranibizumab injections were completed within <math>\pm 10</math> days of the target visit date</p> <p>Randomization visit no more than 5 weeks (35 days) from 8-week visit.</p> <p>At least 21 days since prior study injection.</p> <p>Visual acuity letter score in study eye <math>\leq 78</math> and <math>\geq 24</math> (approximate Snellen equivalent 20/32 to 20/320)</p> <p>On clinical exam, definite retinal thickening due to DME involving the center of the macula</p> <p>Central subfield (CSF) thickness (microns) on optical coherence tomography (OCT) meeting either one of the following two gender- and OCT machine-specific criteria: Zeiss Cirrus: <math>\geq 290</math> in women, <math>\geq 305</math> in men; Heidelberg Spectralis: <math>\geq 305</math> in women, <math>\geq 320</math> in men</p>                                                                                                                                                                                     |
| <b>Exclusion</b>                                    | <p>History of chronic renal failure requiring dialysis or kidney transplant</p> <p>A condition that, in the opinion of the investigator, would preclude participation in the study (e.g., unstable medical status including blood pressure, cardiovascular disease, and glycemic control)</p> <p>Initiation of intensive insulin treatment (a pump or multiple daily injections) within 4 months prior to randomization or plans to do so in the next 4 months</p> <p>Participation in an investigational trial that involved treatment with any drug that has not received regulatory approval for the indication being studied within 30 days of enrollment</p> <p>Known allergy to any component of the study drugs (including povidone iodine prep)</p> <p>Blood pressure &gt; 180/110 (systolic above 180 OR diastolic above 110)</p> <p>Myocardial infarction, other acute cardiac event requiring hospitalization, stroke, transient ischemic attack, or treatment for acute congestive heart failure within one month prior to enrollment</p> |

**eTable 2. Per-Protocol Analysis of Visual Acuity and Retinal Thickness <sup>a</sup>**

|                                                                 | Dexamethasone +<br>Ranibizumab <sup>b</sup> | Sham Treatment +<br>Ranibizumab <sup>b</sup> | Adjusted Difference:<br>Combination-<br>Ranibizumab (95% CI) <sup>c</sup> | P Value |
|-----------------------------------------------------------------|---------------------------------------------|----------------------------------------------|---------------------------------------------------------------------------|---------|
| <b>No. of eyes</b>                                              | <b>59</b>                                   | <b>63</b>                                    |                                                                           |         |
| <b>Visual Acuity (Letter Score) at 24 Weeks</b>                 |                                             |                                              |                                                                           |         |
| Mean (SD)                                                       | 67 (13.2)                                   | 66 (15.1)                                    |                                                                           |         |
| Snellen equivalent, mean                                        | 20/50                                       | 20/50                                        |                                                                           |         |
| <b>Change from randomization visit</b>                          |                                             |                                              |                                                                           |         |
| Median (IQR)                                                    | +2 (-1, +8)                                 | +4 (0, +8)                                   |                                                                           |         |
| Mean (SD)                                                       | +2.5 (9.7)                                  | +2.9 (7.0)                                   | -0.1 (-3.6, +3.3)                                                         | .93     |
| <b>Central Subfield Thickness (µm) <sup>d</sup> at 24 Weeks</b> |                                             |                                              |                                                                           |         |
| Median (IQR)                                                    | 256 (191, 316)                              | 284 (239, 396)                               |                                                                           |         |
| Mean (SD)                                                       | 263 (97)                                    | 335 (137)                                    |                                                                           |         |
| <b>Change from randomization visit <sup>e</sup></b>             |                                             |                                              |                                                                           |         |
| Median (IQR)                                                    | -93 (-148, -55)                             | -42 (-105, -10)                              |                                                                           |         |
| Mean (SD)                                                       | -110 (84)                                   | -62 (98)                                     | -54 (-91, -17)                                                            | .01     |

SD, standard deviation; IQR, interquartile range

<sup>a</sup> Empty cells indicate not applicable.

<sup>b</sup> Observed data only, including only participants who received all required injections at the completed visits without receiving any non-protocol treatments and had data at the 24-week visit.

<sup>c</sup> Treatment group differences and the corresponding 95% CIs and P Values were obtained using a linear mixed model (see detailed footnote under Table 3). No imputation for missing data was performed.

<sup>d</sup> Optical coherence tomography values obtained by spectral-domain OCT were converted to time-domain equivalent values for analysis and reporting as follows:  $-43.12 + 1.01 \times$  Zeiss Cirrus;  $-72.76 + 1.03 \times$  Spectralis. One optical coherence tomography value was missing for combination group due to low resolution.

<sup>e</sup> Change in OCT central subfield thickness (in microns) was truncated at 3 SD from the mean [-372, +201] (calculated using observed changes at 24 weeks combining all treatment groups), to minimize the effect of outliers. Two values were truncated in the sham group: one on the negative end, and one on the positive end.

**eTable 3. Pre-Planned Subgroup Analysis of Visual Acuity and Retinal Thickness<sup>a</sup>**

|                                                                                                   | Dexamethasone + Ranibizumab |             | Sham Treatment + Ranibizumab |            | Adjusted Difference: Combination-Ranibizumab (95% CI) <sup>b</sup> | P Value for Interaction <sup>b</sup> |
|---------------------------------------------------------------------------------------------------|-----------------------------|-------------|------------------------------|------------|--------------------------------------------------------------------|--------------------------------------|
| No. of eyes                                                                                       | 63                          |             | 64                           |            |                                                                    |                                      |
| <b>Change in Visual Acuity (Letter Score) at 24 Weeks from Randomization Visit</b>                |                             |             |                              |            |                                                                    |                                      |
| <b>Baseline lens status</b>                                                                       |                             |             |                              |            |                                                                    |                                      |
|                                                                                                   | No. of eyes                 | Mean (SD)   | No. of eyes                  | Mean (SD)  |                                                                    |                                      |
| Pseudophakic                                                                                      | 25                          | +5.1 (9.7)  | 32                           | +2.0 (7.6) | +3.1 (-2.1, +8.3)                                                  | .08                                  |
| Phakic                                                                                            | 38                          | +1.1 (9.7)  | 32                           | +4.1 (6.4) | -3.0 (-7.7, +1.7)                                                  |                                      |
| <b>Improvement in visual acuity during run-in phase<sup>c</sup></b>                               |                             |             |                              |            |                                                                    |                                      |
|                                                                                                   | No. of eyes                 | Mean (SD)   | No. of eyes                  | Mean (SD)  |                                                                    |                                      |
| Presence                                                                                          | 33                          | +2.6 (10.6) | 36                           | +3.6 (7.0) | -1.1 (-5.8, +3.6)                                                  | .65                                  |
| Absence                                                                                           | 30                          | +2.8 (9.1)  | 28                           | +2.3 (7.2) | +0.4 (-4.8, +5.5)                                                  |                                      |
| <b>Improvement in OCT central subfield thickness during run-in phase<sup>d</sup></b>              |                             |             |                              |            |                                                                    |                                      |
|                                                                                                   | No. of eyes                 | Mean (SD)   | No. of eyes                  | Mean (SD)  |                                                                    |                                      |
| Presence                                                                                          | 37                          | +4.1 (9.9)  | 38                           | +3.0 (7.2) | +1.0 (-3.6, +5.7)                                                  | .27                                  |
| Absence                                                                                           | 26                          | +0.7 (9.6)  | 26                           | +3.0 (7.0) | -2.6 (-8.1, +2.9)                                                  |                                      |
| <b>Change in Central Subfield Thickness (µm)<sup>e</sup> at 24 Weeks from Randomization Visit</b> |                             |             |                              |            |                                                                    |                                      |
| <b>Baseline lens status</b>                                                                       |                             |             |                              |            |                                                                    |                                      |
|                                                                                                   | No. of eyes                 | Mean (SD)   | No. of eyes                  | Mean (SD)  |                                                                    |                                      |
| Pseudophakic                                                                                      | 25                          | -111 (86)   | 32                           | -49 (96)   | -78 (-131, -25)                                                    | .17                                  |
| Phakic                                                                                            | 37                          | -110 (86)   | 32                           | -75 (99)   | -30 (-78, +17)                                                     |                                      |
| <b>Improvement in visual acuity during run-in phase<sup>c</sup></b>                               |                             |             |                              |            |                                                                    |                                      |
|                                                                                                   | No. of eyes                 | Mean (SD)   | No. of eyes                  | Mean (SD)  |                                                                    |                                      |
| Presence                                                                                          | 33                          | -124 (84)   | 36                           | -63 (116)  | -68 (-118, -19)                                                    | .33                                  |
| Absence                                                                                           | 29                          | -95 (86)    | 28                           | -61 (68)   | -36 (-90, +17)                                                     |                                      |
| <b>Improvement in OCT central subfield thickness during run-in phase<sup>d</sup></b>              |                             |             |                              |            |                                                                    |                                      |
|                                                                                                   | No. of eyes                 | Mean (SD)   | No. of eyes                  | Mean (SD)  |                                                                    |                                      |
| Presence                                                                                          | 36                          | -132 (92)   | 38                           | -73 (114)  | -74 (-121, -28)                                                    | .15                                  |
| Absence                                                                                           | 26                          | -80 (66)    | 26                           | -47 (65)   | -25 (-80, +30)                                                     |                                      |

OCT, optical coherence tomography

<sup>a</sup> Observed data only, including participants who completed 24-week visit. Empty cells indicate not applicable.

<sup>b</sup> Treatment group differences and the corresponding 95% CIs and P Values were obtained from a linear mixed model mimicking the primary analysis model by adding an interaction between subgroup and treatment. No imputation for missing data was performed. See detailed footnote under Table 3.

<sup>c</sup> Presence or absence of improvement in visual acuity during the run-in phase, defined as five or more letter gain in visual acuity at any run-in visit, compared with the prior visit.

<sup>d</sup> Presence or absence of improvement in retinal thickness during the run-in phase, defined as reduction in central subfield thickness by 10% at any run-in visit, compared with the prior visit.

<sup>e</sup> Change in OCT central subfield thickness (in microns) was truncated at 3 SD from the mean [-372, +201], (calculated using observed changes at 24 weeks combining all treatment groups), to minimize the effect of outliers. Two values were truncated in the sham group: one on the negative end, and one on the positive end.

**eTable 4. Post Hoc Subgroup Analysis of Visual Acuity <sup>a</sup>**

|                                                                                    | Dexamethasone + Ranibizumab |             | Sham Treatment + Ranibizumab |            | Adjusted Difference: Combination-Ranibizumab (95% CI) <sup>c</sup> | P Value for Interaction <sup>c</sup> |
|------------------------------------------------------------------------------------|-----------------------------|-------------|------------------------------|------------|--------------------------------------------------------------------|--------------------------------------|
| No. of eyes                                                                        | 63                          |             | 64                           |            |                                                                    |                                      |
| <b>Change in Visual Acuity (Letter Score) at 24 Weeks from Randomization Visit</b> |                             |             |                              |            |                                                                    |                                      |
| <b>Baseline visual acuity</b>                                                      |                             |             |                              |            |                                                                    |                                      |
|                                                                                    | No. of eyes                 | Mean (SD)   | No. of eyes                  | Mean (SD)  |                                                                    |                                      |
| Worse than 20/50 (<64)                                                             | 27                          | +6.2 (11.6) | 27                           | +3.3 (8.2) | +2.7 (-2.6, +8.1)                                                  | .10                                  |
| 20/50 or better (≥64)                                                              | 36                          | 0 (7.4)     | 37                           | +2.8 (6.3) | -3.0 (-7.5, +1.6)                                                  |                                      |
| <b>Number of anti-VEGF injections within 20 weeks prior to run-in <sup>b</sup></b> |                             |             |                              |            |                                                                    |                                      |
|                                                                                    | No. of eyes                 | Mean (SD)   | No. of eyes                  | Mean (SD)  |                                                                    |                                      |
| 3 injections                                                                       | 32                          | +4.8 (9.5)  | 44                           | +3.3 (7.1) | +1.3 (-3.4, +6.0)                                                  | .25                                  |
| ≥ 4 injections                                                                     | 27                          | -0.2 (10.3) | 19                           | +2.5 (7.2) | -2.8 (-8.9, +3.3)                                                  |                                      |

anti-VEGF, anti-vascular endothelial growth factor

<sup>a</sup> Observed data only, including participants who completed 24-week visit. Empty cells indicate not applicable.

<sup>b</sup> Treatment group differences and the corresponding 95% CIs and P Values were obtained from a linear mixed model mimicking the primary analysis by adding an interaction between subgroup and treatment. No imputation for missing data was performed. See detailed footnote under Table 3.

<sup>c</sup> Five participants (4 in combination and 1 in ranibizumab group) reported number of injections within 36 weeks instead and thus were excluded from the analysis.

**eTable 5. Ocular Adverse Events During Randomization Phase**

|                                                                                                        | Dexamethasone +<br>Ranibizumab | Sham Treatment<br>+ Ranibizumab | P Value <sup>b</sup> |
|--------------------------------------------------------------------------------------------------------|--------------------------------|---------------------------------|----------------------|
| <b>No. (%) of study eyes</b>                                                                           | <b>65 (100)</b>                | <b>64 (100)</b>                 |                      |
| <b>Eyes with at least one ocular adverse event<sup>a</sup></b>                                         | 41 (63)                        | 20 (31)                         | <.001                |
| <b>Increased intraocular pressure (defined as any of the below)</b>                                    | 19 (29)                        | 0                               | <.001                |
| Increase ≥ 10 mmHg from randomization at any visit                                                     | 15 (23)                        | 0                               | <.001                |
| IOP ≥ 30 mmHg at any visit                                                                             | 10 (15)                        | 0                               | .001                 |
| Received ocular anti-hypertensives                                                                     | 13 (20)                        | 0                               | <.001                |
| <b>Endophthalmitis</b>                                                                                 | 0                              | 0                               |                      |
| <b>Inflammation</b>                                                                                    | 1 (2) <sup>c</sup>             | 0                               | 1.00                 |
| <b>Any retinal detachment</b>                                                                          | 1 (2)                          | 0                               | 1.00                 |
| Traction retinal detachment                                                                            | 0                              | 0                               |                      |
| Rhegmatogenous retinal detachment                                                                      | 1 (2)                          | 0                               | 1.00                 |
| Unspecified retinal detachment                                                                         | 0                              | 0                               |                      |
| <b>Retinal tears</b>                                                                                   | 0                              | 0                               |                      |
| <b>Retinal hemorrhage</b>                                                                              | 0                              | 0                               |                      |
| <b>Vitreous hemorrhage</b>                                                                             | 1 (2)                          | 0                               | 1.00                 |
| <b>Cataract extractions</b>                                                                            | 3 (5) <sup>c</sup>             | 0                               | .24                  |
| <b>Glaucoma surgery</b>                                                                                | 0                              | 0                               |                      |
| <b>Received post-injection treatment to lower IOP</b>                                                  | 9 (14)                         | 4 (6)                           | .24                  |
| <b>Migration of dexamethasone implant to the anterior chamber and subsequent corneal complications</b> | 0                              | N/A                             |                      |

IOP, intraocular pressure

<sup>a</sup> Some events may have been reported more than once (i.e. at multiple visits). Including study eyes that experienced at least one adverse event of interest.

<sup>b</sup> P Value to compare treatment group difference in proportions using Fisher's exact test.

<sup>c</sup> One participant reported both inflammation and cataract extractions.

**eTable 6. Systemic Adverse Events During Randomization Phase**

|                                                                                                                    | Dexamethasone +<br>Ranibizumab | Sham<br>Treatment +<br>Ranibizumab | Bilateral       | P Value <sup>f</sup> |
|--------------------------------------------------------------------------------------------------------------------|--------------------------------|------------------------------------|-----------------|----------------------|
| <b>No. (%) of randomized participants</b>                                                                          | <b>52 (100)</b>                | <b>51 (100)</b>                    | <b>13 (100)</b> |                      |
| <b>No. (%) of participants with at least one systemic adverse event <sup>a</sup></b>                               | 25 (48)                        | 21 (41)                            | 7 (54)          | .55                  |
| <b>No. (%) of participants with at least one serious systemic adverse event <sup>b</sup></b>                       | 5 (10)                         | 7 (14)                             | 1 (8)           | .55                  |
| <b>No. (%) of participants with at least one hospitalization</b>                                                   | 5 (10)                         | 7 (14)                             | 1 (8)           | .55                  |
| <b>No. (%) of death</b>                                                                                            | 0                              | 0                                  | 0               |                      |
| <b>No. (%) of participants with at least one non-fatal myocardial infarction <sup>c</sup></b>                      | 0                              | 0                                  | 0               |                      |
| <b>No. (%) of participants with at least one non-fatal stroke (ischemic, hemorrhagic, or unknown) <sup>c</sup></b> | 0                              | 1 (2)                              | 0               | .50                  |
| <b>No. (%) of vascular death <sup>d</sup></b>                                                                      | 0                              | 0                                  | 0               |                      |
| <b>No. (%) of participants with at least one APTC cardiovascular/cerebrovascular event <sup>e</sup></b>            | 0                              | 1 (2)                              | 0               | .50                  |

<sup>a</sup> Some events may have been reported more than once (i.e. at multiple visits)

<sup>b</sup> A serious adverse event is defined as an event that meets one or more of the following criteria: results in death; is life threatening; requires inpatient hospitalization or prolongation of existing hospitalization; results in persistent or significant disability/incapacity; is a congenital anomaly/birth defect. Listing of unique serious adverse events: Combination group: abdominal pain, acute kidney injury, diastolic dysfunction, multiple fractures, and upper respiratory tract infection. Ranibizumab group: acute kidney injury, cerebrovascular accident, coronary artery bypass, hypertension, hypoglycaemia, infection, pneumonia, stent placement, and vascular graft. Bilateral group: multiple fractures.

<sup>c</sup> Defined as no death prior to outcome time point.

<sup>d</sup> From any potential vascular or unknown cause

<sup>e</sup> Antiplatelet Trialists' Collaboration. *BMJ*. 1994 Jan 8;308(6921):81-106.

<sup>f</sup> P Value to compare treatment group difference in proportions using Fisher's exact test, including unilateral participants only.

**eTable 7. All Adverse Events During Randomization Phase by MedDRA System Organ Class**

|                                                                     | Dexamethasone +<br>Ranibizumab | Sham Treatment +<br>Ranibizumab | Bilateral |
|---------------------------------------------------------------------|--------------------------------|---------------------------------|-----------|
| <b>No. of randomized participants</b>                               | <b>52</b>                      | <b>51</b>                       | <b>13</b> |
| <b>No. (%) of participants had at least one adverse event</b>       |                                |                                 |           |
| Blood and lymphatic system disorders                                | 1 (2)                          | 1 (2)                           | 0         |
| Cardiac disorders                                                   | 2 (4)                          | 2 (4)                           | 0         |
| Endocrine disorders                                                 | 1 (2)                          | 1 (2)                           | 1 (8)     |
| Eye disorders                                                       | 26 (50)                        | 16 (31)                         | 2 (15)    |
| Gastrointestinal disorders                                          | 7 (13)                         | 3 (6)                           | 0         |
| General disorders and administration site conditions                | 0                              | 3 (6)                           | 0         |
| Infections and infestations                                         | 2 (4)                          | 6 (12)                          | 1 (8)     |
| Injury, poisoning and procedural complications                      | 3 (6)                          | 3 (6)                           | 0         |
| Investigations                                                      | 11 (21)                        | 1 (2)                           | 2 (15)    |
| Metabolism and nutrition disorders                                  | 2 (4)                          | 1 (2)                           | 0         |
| Musculoskeletal and connective tissue disorders                     | 7 (13)                         | 5 (10)                          | 2 (15)    |
| Neoplasms benign, malignant and unspecified (incl cysts and polyps) | 1 (2)                          | 0                               | 0         |
| Nervous system disorders                                            | 2 (4)                          | 1 (2)                           | 1 (8)     |
| Psychiatric disorders                                               | 0                              | 1 (2)                           | 1 (8)     |
| Renal and urinary disorders                                         | 3 (6)                          | 2 (4)                           | 0         |
| Respiratory, thoracic and mediastinal disorders                     | 3 (6)                          | 4 (8)                           | 2 (15)    |
| Skin and subcutaneous tissue disorders                              | 1 (2)                          | 0                               | 2 (15)    |
| Surgical and medical procedures                                     | 2 (4)                          | 3 (6)                           | 0         |
| Vascular disorders                                                  | 1 (2)                          | 2 (4)                           | 0         |



**eFigure 1. Visual Acuity at 24 Weeks by Treatment Group Assignment**

**a) Visual Acuity Letter Score**

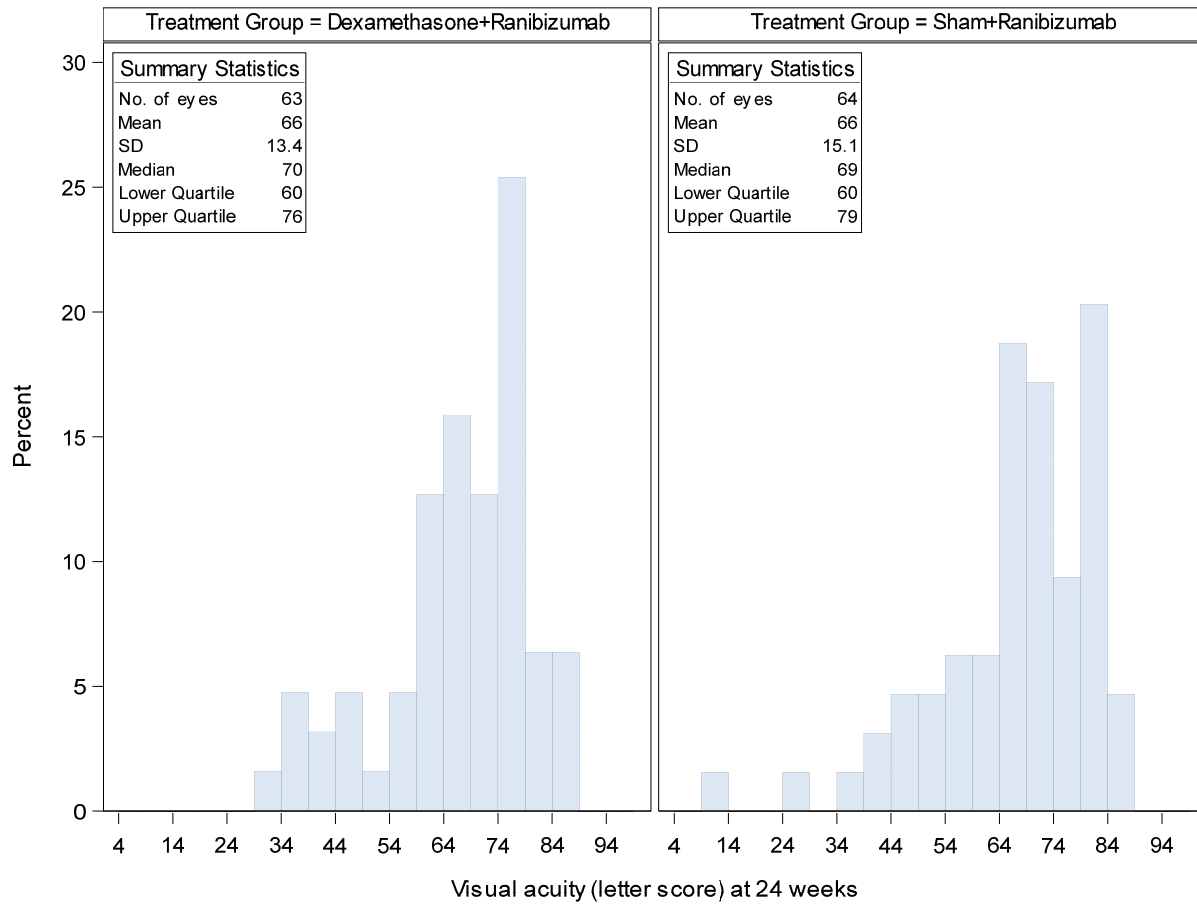

## b) Change in Visual Acuity Letter Score from Randomization

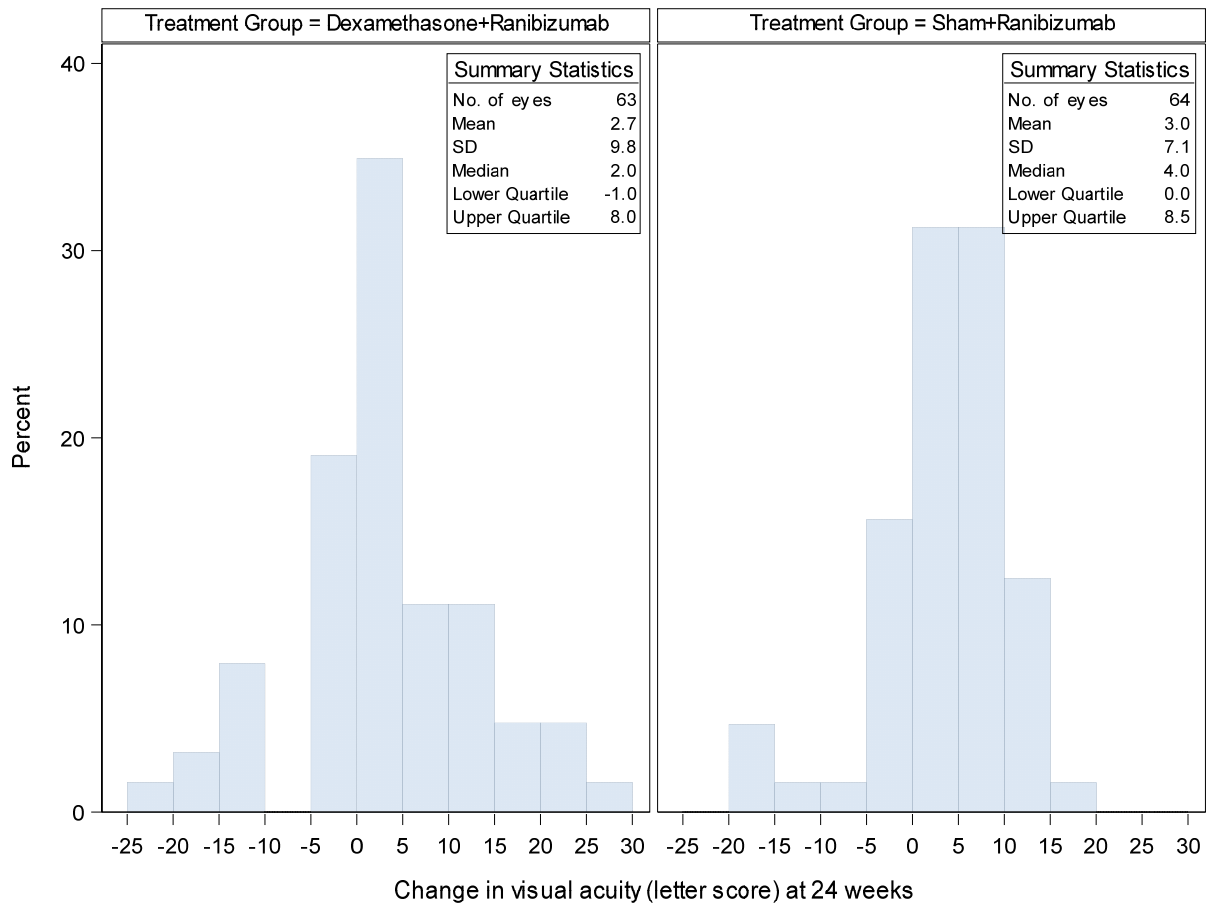

Distribution of visual acuity at 24 weeks by treatment group. A) Visual acuity letter score; B) Change in visual acuity letter score from randomization visit.

**eFigure 2. Mean Change in Visual Acuity by Baseline Lens Status**

**a) Pseudophakic at Baseline**

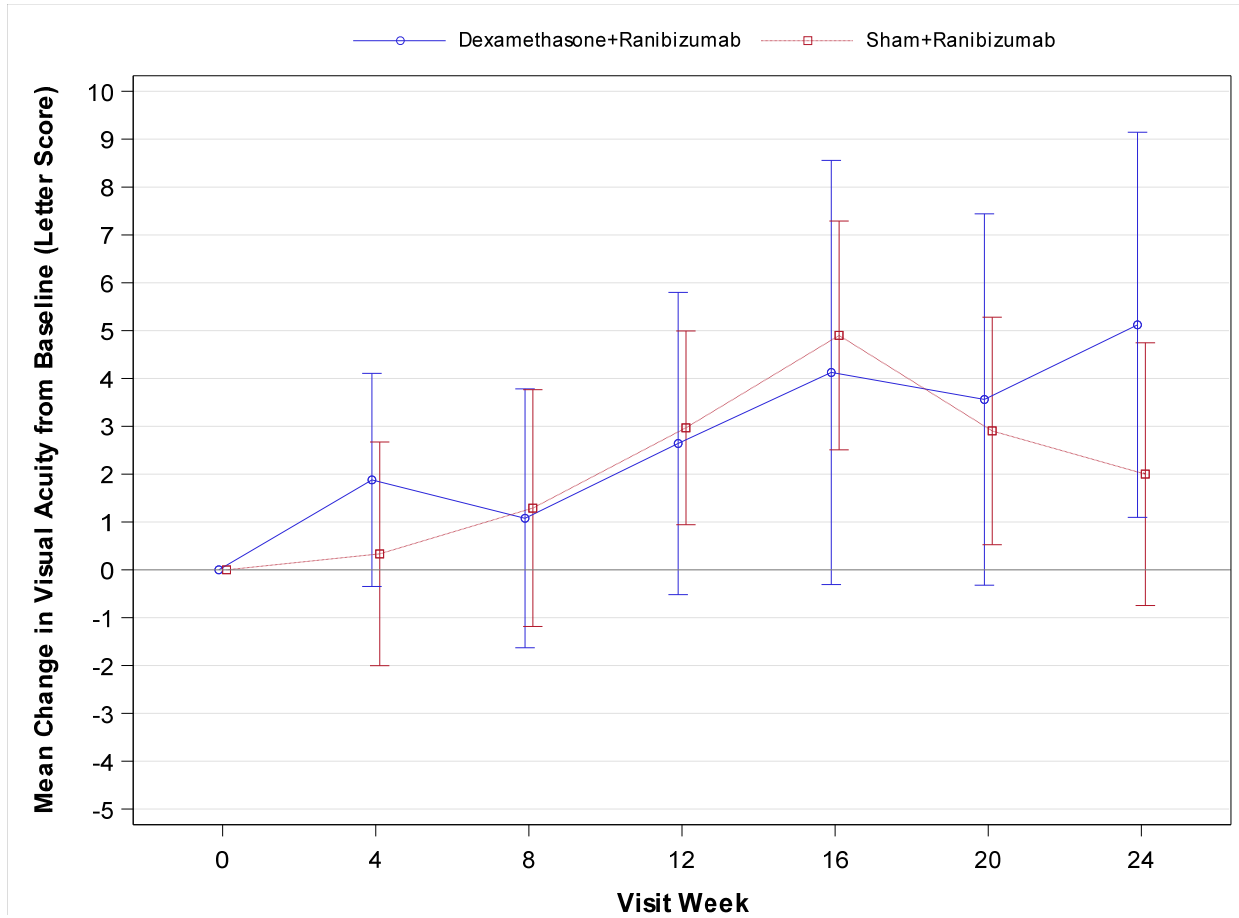

| No. of eyes                | Visit Week |    |    |    |    |    |    |
|----------------------------|------------|----|----|----|----|----|----|
|                            | 0          | 4  | 8  | 12 | 16 | 20 | 24 |
| Dexamethasone +Ranibizumab | 26         | 25 | 26 | 25 | 24 | 25 | 25 |
| Sham +Ranibizumab          | 32         | 30 | 31 | 31 | 30 | 31 | 32 |

### b) Phakic at Baseline

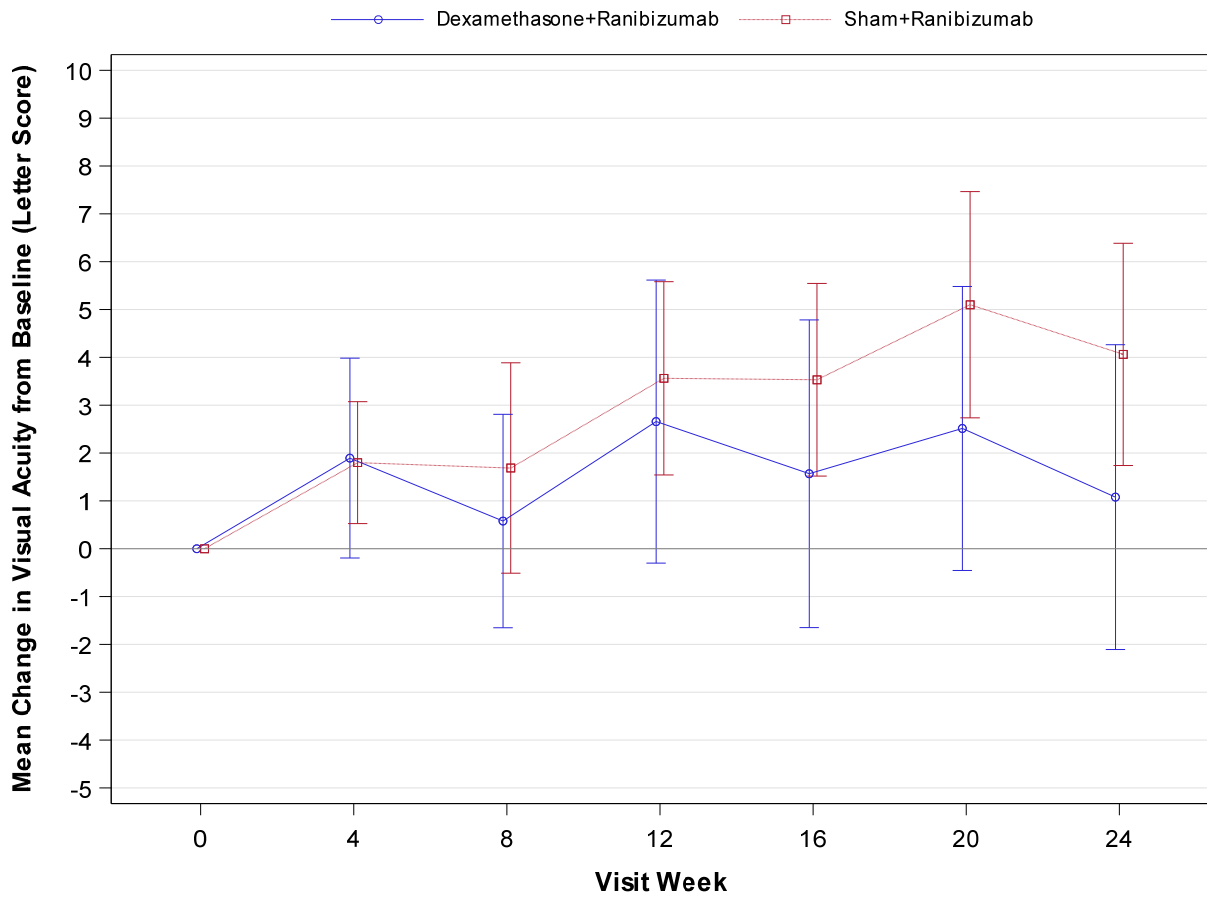

| No. of eyes                | Visit Week |    |    |    |    |    |    |
|----------------------------|------------|----|----|----|----|----|----|
|                            | 0          | 4  | 8  | 12 | 16 | 20 | 24 |
| Dexamethasone +Ranibizumab | 39         | 38 | 38 | 38 | 37 | 35 | 38 |
| Sham +Ranibizumab          | 32         | 30 | 32 | 32 | 32 | 30 | 32 |

Error bars indicate 95% confidence intervals. Outlying values were truncated to 3 standard deviations from the mean. A) Pseudophakic at baseline; B) Phakic at baseline.  $P = .08$  for the interaction between baseline lens status and treatment.

**eFigure 3. Mean Change in Visual Acuity by Improvement in Visual Acuity During Run-in Phase**

**a) Improved**

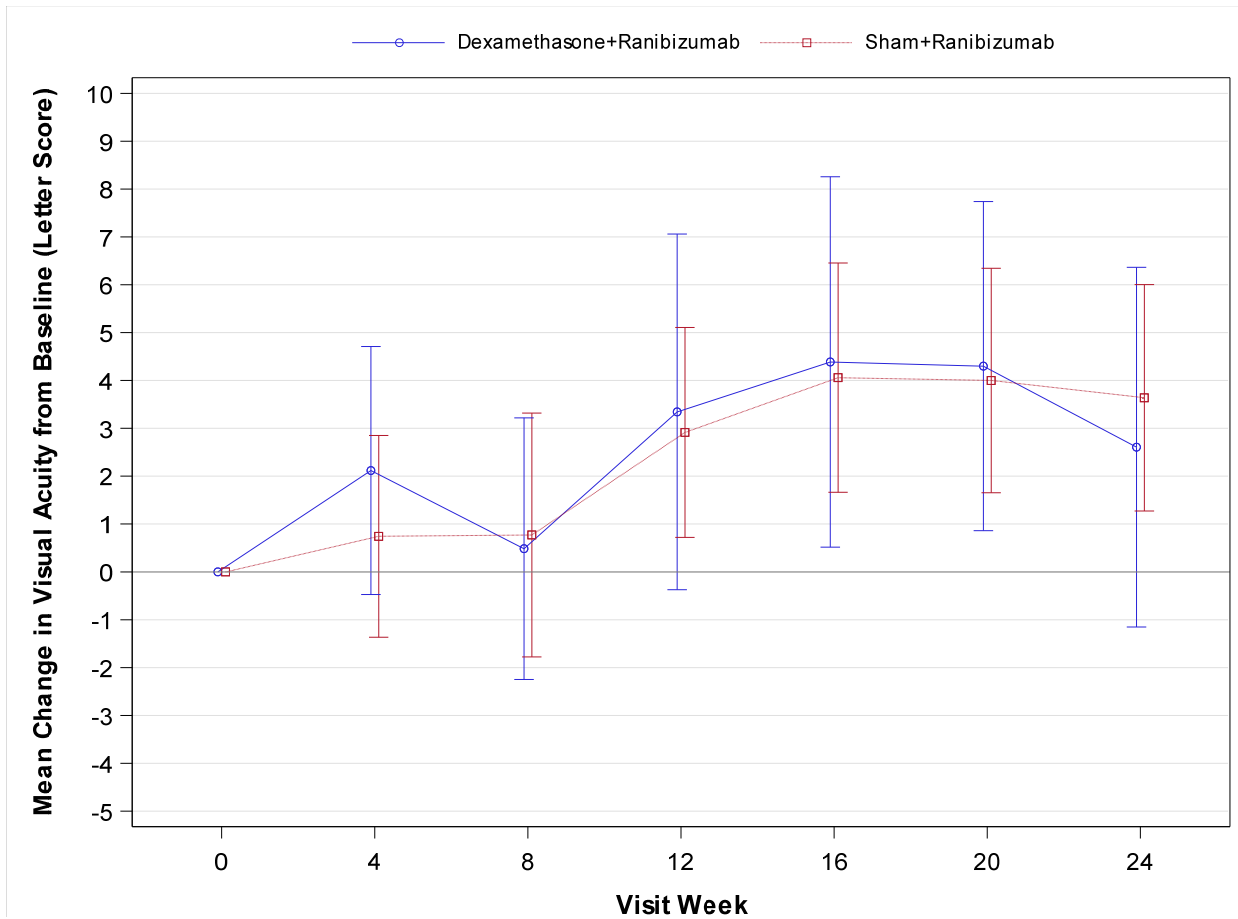

| No. of eyes                | Visit Week |    |    |    |    |    |    |
|----------------------------|------------|----|----|----|----|----|----|
|                            | 0          | 4  | 8  | 12 | 16 | 20 | 24 |
| Dexamethasone +Ranibizumab | 34         | 34 | 33 | 32 | 31 | 30 | 33 |
| Sham +Ranibizumab          | 36         | 35 | 35 | 35 | 34 | 35 | 36 |

### b) Not Improved

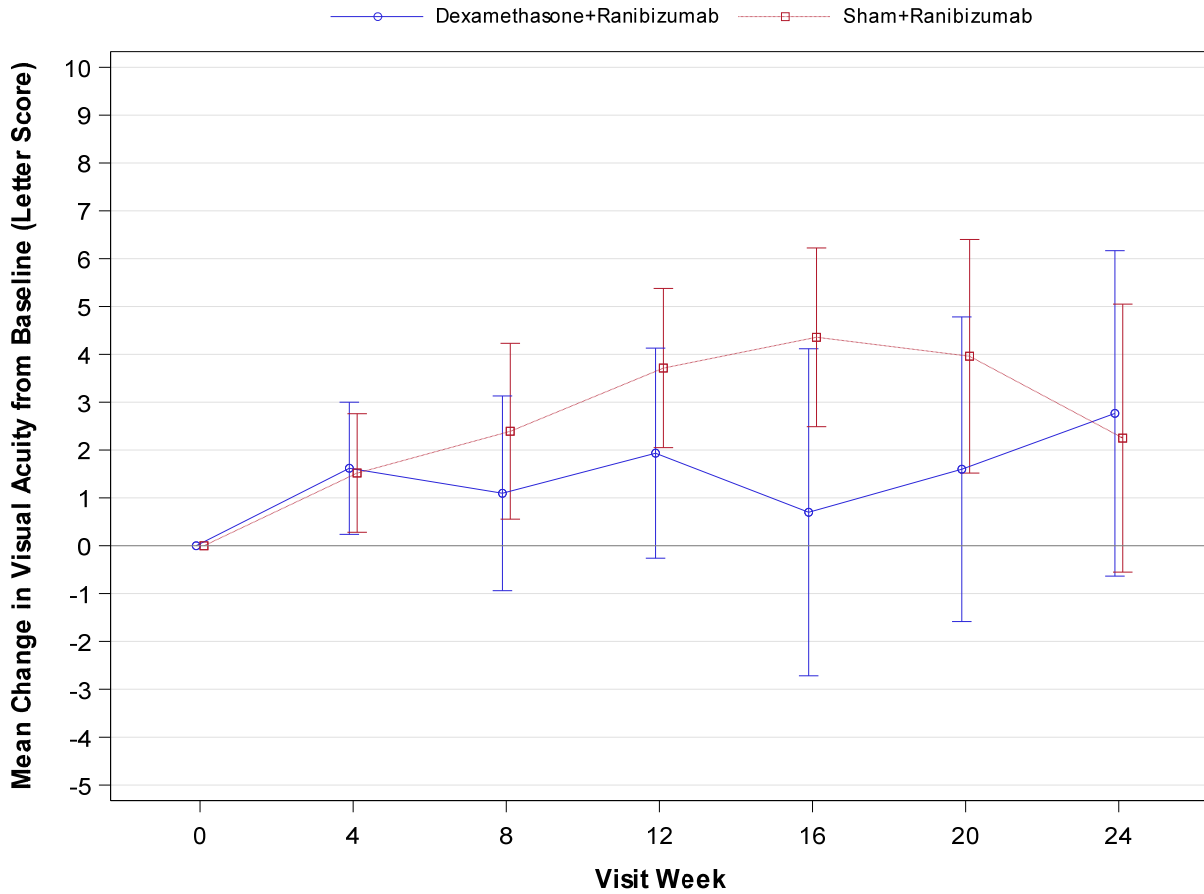

| No. of eyes                | Visit Week |    |    |    |    |    |    |
|----------------------------|------------|----|----|----|----|----|----|
|                            | 0          | 4  | 8  | 12 | 16 | 20 | 24 |
| Dexamethasone +Ranibizumab | 31         | 29 | 31 | 31 | 30 | 30 | 30 |
| Sham +Ranibizumab          | 28         | 25 | 28 | 28 | 28 | 26 | 28 |

Error bars indicate 95% confidence intervals. Outlying values were truncated to 3 standard deviations from the mean. A) Visual acuity improved during run-in phase; B) Visual acuity not improved during run-in phase.  $P = 0.65$  for the interaction between treatment and improvement in visual acuity during run-in phase.

**eFigure 4. Mean Change in Visual Acuity by Improvement in Central Subfield Thickness During Run-in Phase**

**a) Improved**

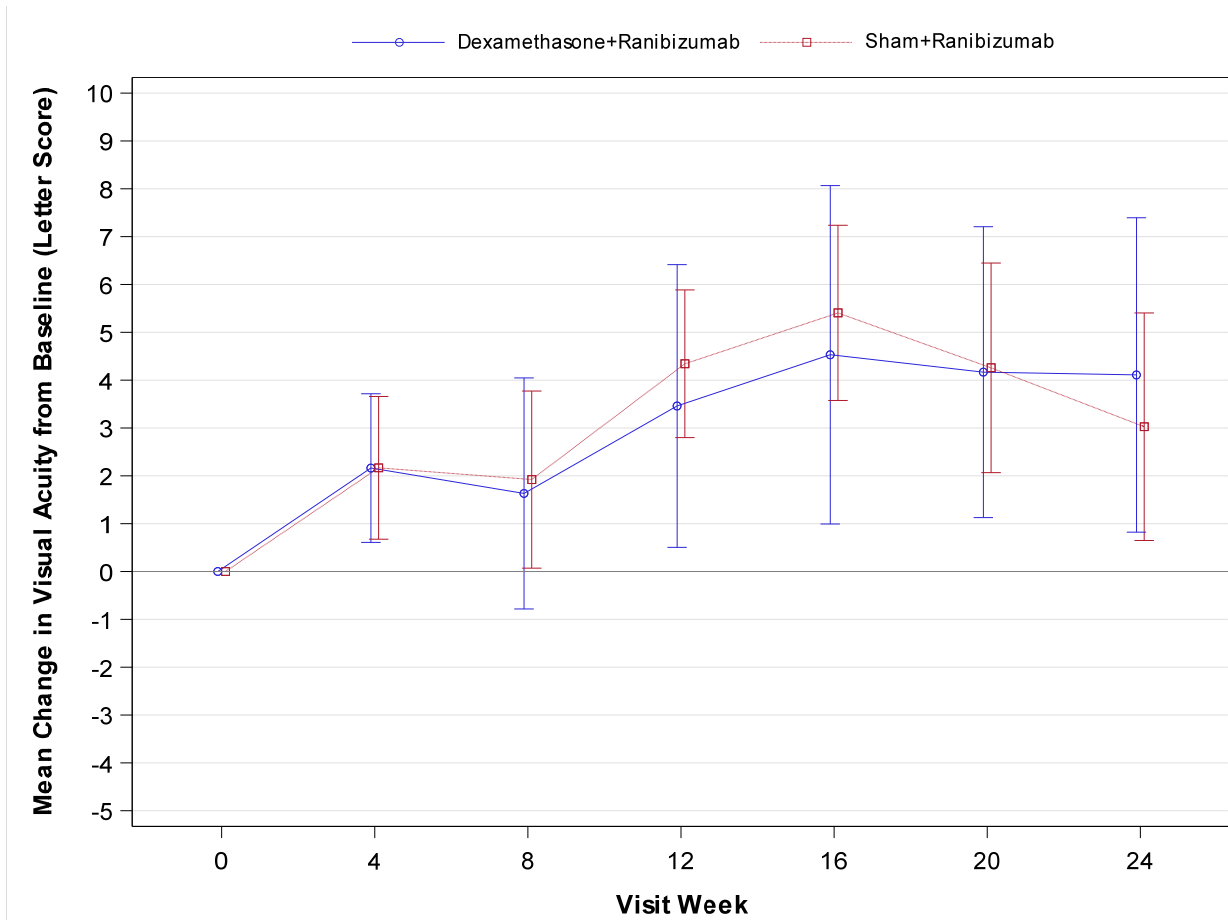

| No. of eyes                | Visit Week |    |    |    |    |    |    |
|----------------------------|------------|----|----|----|----|----|----|
|                            | 0          | 4  | 8  | 12 | 16 | 20 | 24 |
| Dexamethasone +Ranibizumab | 38         | 37 | 38 | 37 | 34 | 36 | 37 |
| Sham +Ranibizumab          | 38         | 36 | 38 | 38 | 37 | 35 | 38 |



### b) Not Improved

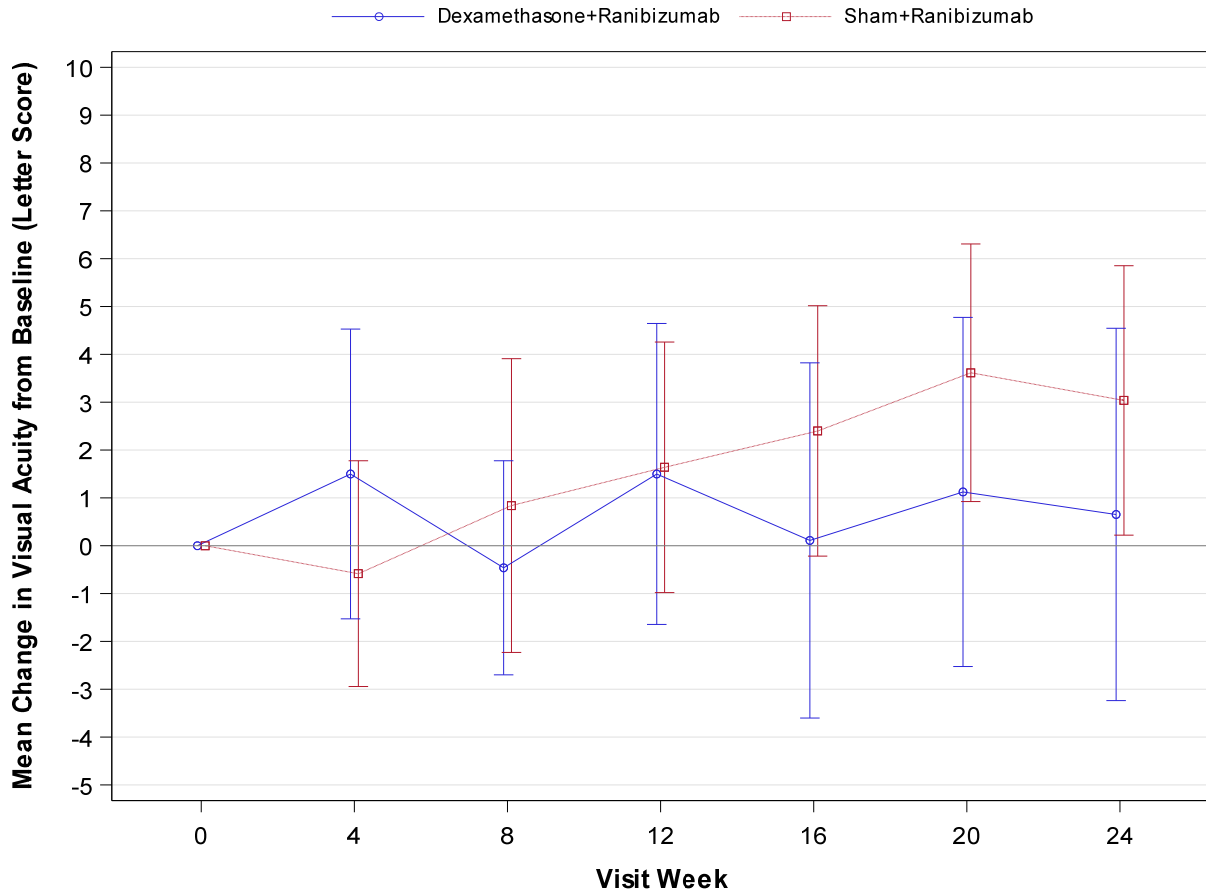

| No. of eyes                | Visit Week |    |    |    |    |    |    |
|----------------------------|------------|----|----|----|----|----|----|
|                            | 0          | 4  | 8  | 12 | 16 | 20 | 24 |
| Dexamethasone +Ranibizumab | 27         | 26 | 26 | 26 | 27 | 24 | 26 |
| Sham +Ranibizumab          | 26         | 24 | 25 | 25 | 25 | 26 | 26 |

Error bars indicate 95% confidence intervals. Outlying values were truncated to 3 standard deviations from the mean. A) Optical coherence tomography (OCT) central subfield thickness improved during run-in phase; B) OCT central subfield thickness not improved during run-in phase.  $P = .27$  for the interaction between treatment and improvement in OCT during run-in phase.

**eFigure 5. Mean Change in Central Subfield Thickness by Baseline Lens Status**

**a) Pseudophakic at Baseline**

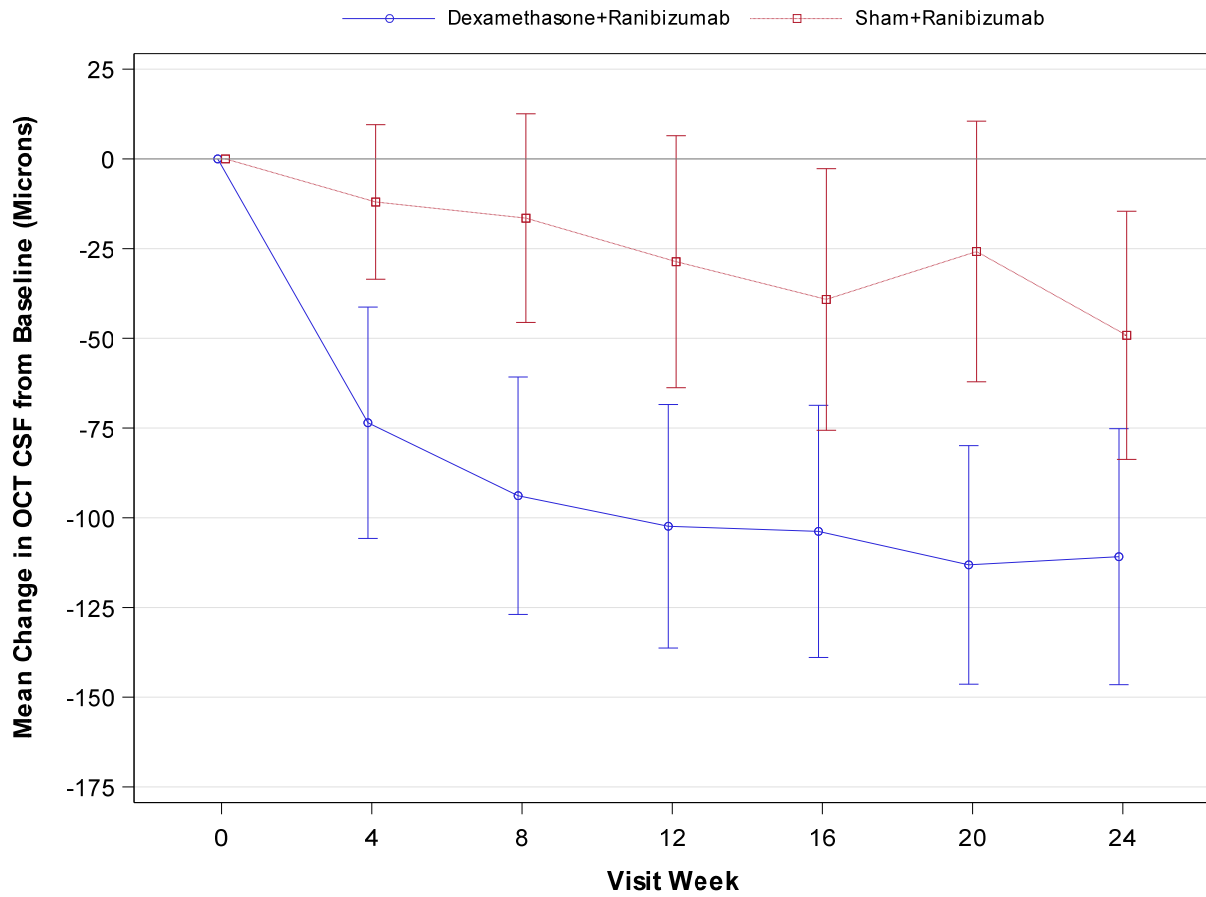

| No. of eyes                | Visit Week |    |    |    |    |    |    |
|----------------------------|------------|----|----|----|----|----|----|
|                            | 0          | 4  | 8  | 12 | 16 | 20 | 24 |
| Dexamethasone +Ranibizumab | 26         | 25 | 26 | 25 | 23 | 24 | 25 |
| Sham +Ranibizumab          | 32         | 30 | 31 | 31 | 30 | 30 | 32 |

### b) Phakic at Baseline

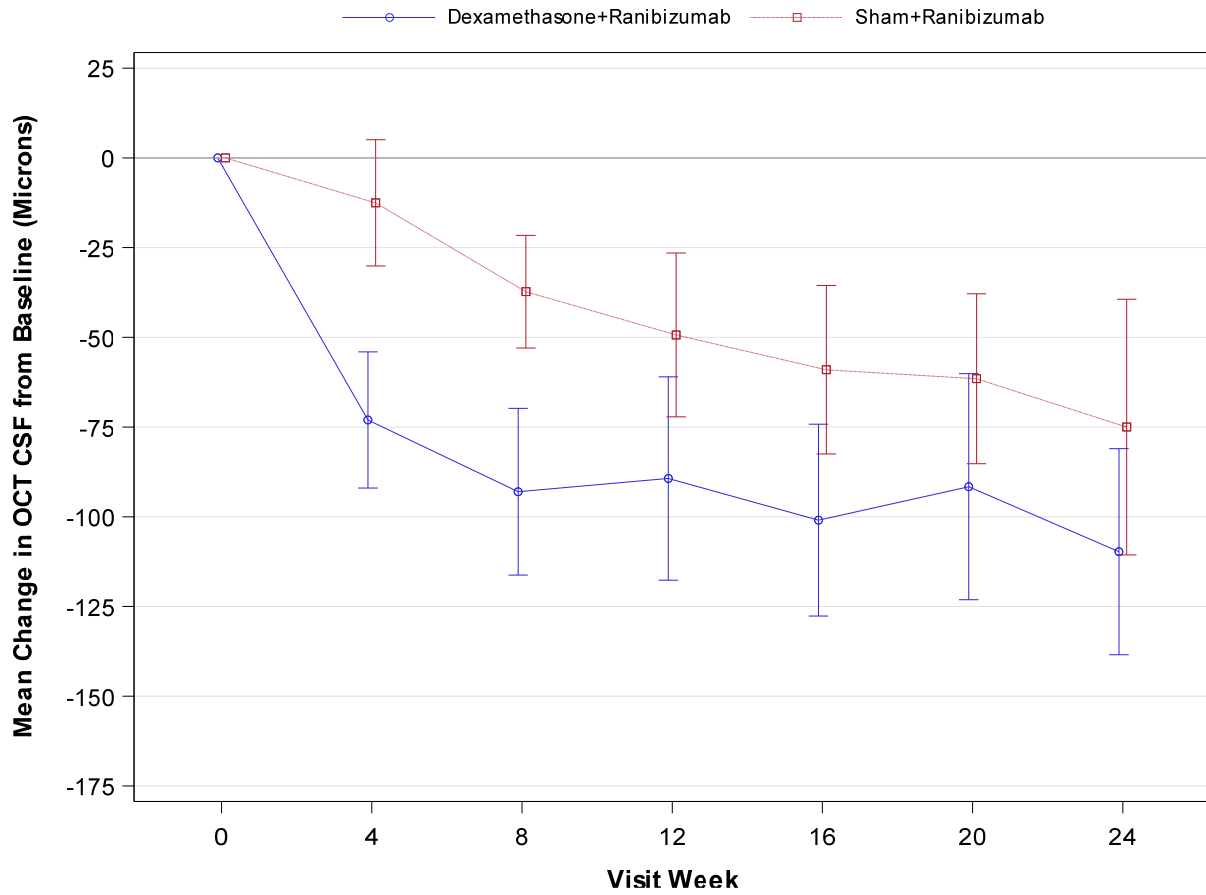

| No. of eyes                | Visit Week |    |    |    |    |    |    |
|----------------------------|------------|----|----|----|----|----|----|
|                            | 0          | 4  | 8  | 12 | 16 | 20 | 24 |
| Dexamethasone +Ranibizumab | 39         | 38 | 38 | 37 | 37 | 34 | 37 |
| Sham +Ranibizumab          | 32         | 30 | 32 | 32 | 32 | 30 | 32 |

OCT, optical coherence tomography; CSF, central subfield thickness

Error bars indicate 95% confidence intervals. Outlying values were truncated to 3 standard deviations from the mean. A) Pseudophakic at baseline; B) Phakic at baseline.  $P = .17$  for the interaction between baseline lens status and treatment.

**eFigure 6. Mean Change in Central Subfield Thickness by Improvement in Visual Acuity During Run-in Phase**

**a) Improved**

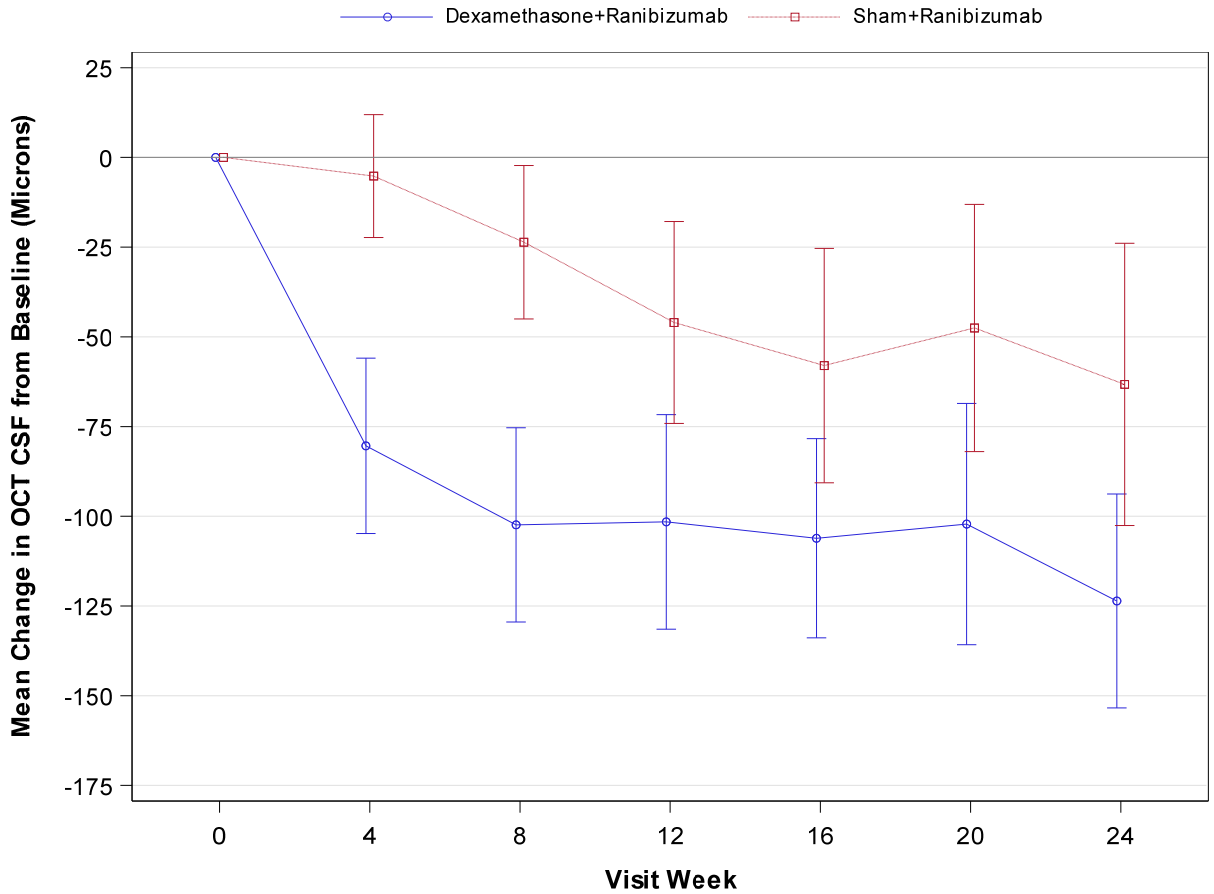

| No. of eyes                       | Visit Week |    |    |    |    |    |    |
|-----------------------------------|------------|----|----|----|----|----|----|
|                                   | 0          | 4  | 8  | 12 | 16 | 20 | 24 |
| <b>Dexamethasone +Ranibizumab</b> | 34         | 34 | 33 | 32 | 31 | 29 | 33 |
| <b>Sham +Ranibizumab</b>          | 36         | 35 | 35 | 35 | 34 | 34 | 36 |

**b) Not Improved**

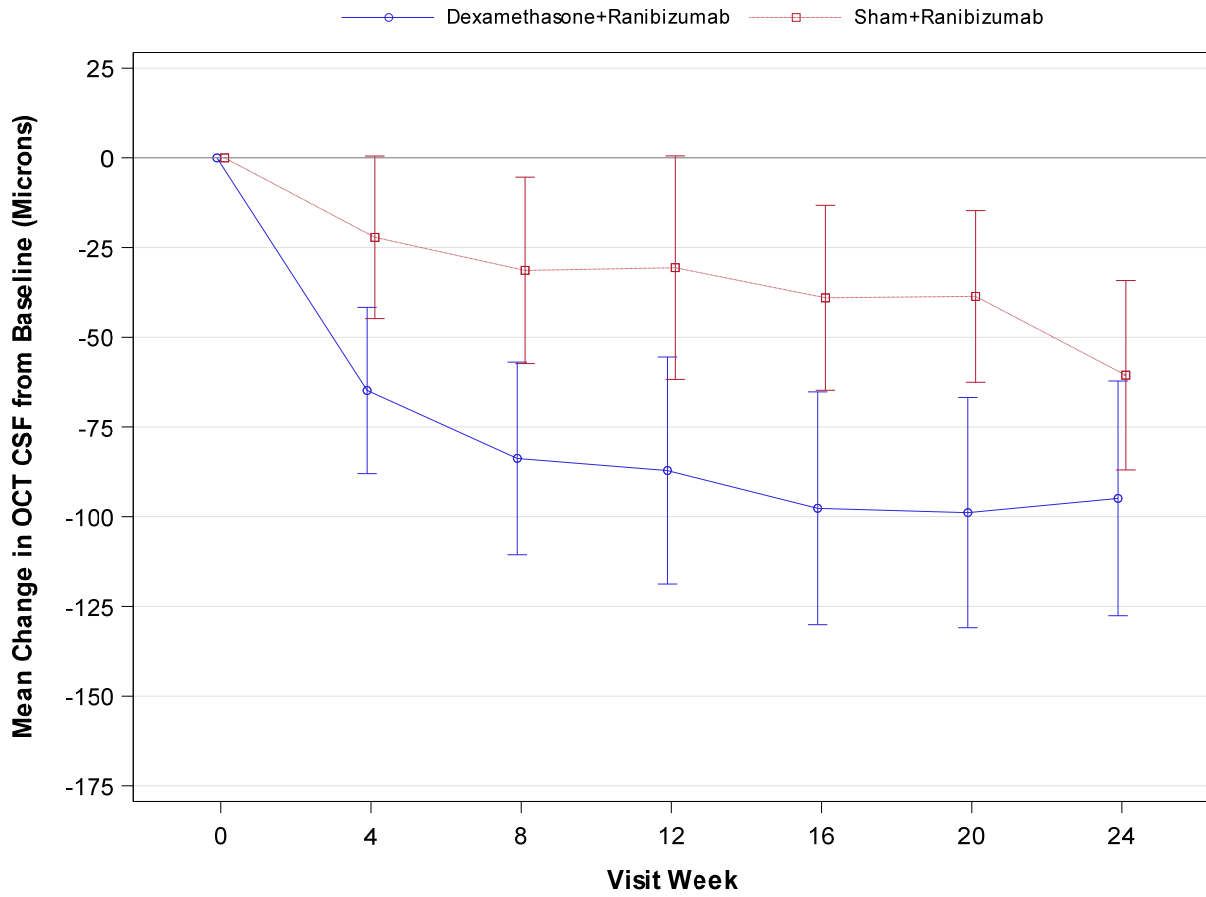

| No. of eyes                       | Visit Week |    |    |    |    |    |    |
|-----------------------------------|------------|----|----|----|----|----|----|
|                                   | 0          | 4  | 8  | 12 | 16 | 20 | 24 |
| <b>Dexamethasone +Ranibizumab</b> | 31         | 29 | 31 | 30 | 29 | 29 | 29 |
| <b>Sham +Ranibizumab</b>          | 28         | 25 | 28 | 28 | 28 | 26 | 28 |

OCT, optical coherence tomography; CSF, central subfield thickness

Error bars indicate 95% confidence intervals. Outlying values were truncated to 3 standard deviations from the mean. A) Visual acuity improved during run-in phase; B) Visual acuity not improved during run-in phase.  $P = .33$  for the interaction between treatment and improvement in visual acuity during run-in phase.

**eFigure 7. Mean Change in Central Subfield Thickness by Improvement in Central Subfield Thickness During Run-in Phase**

**a) Improved**

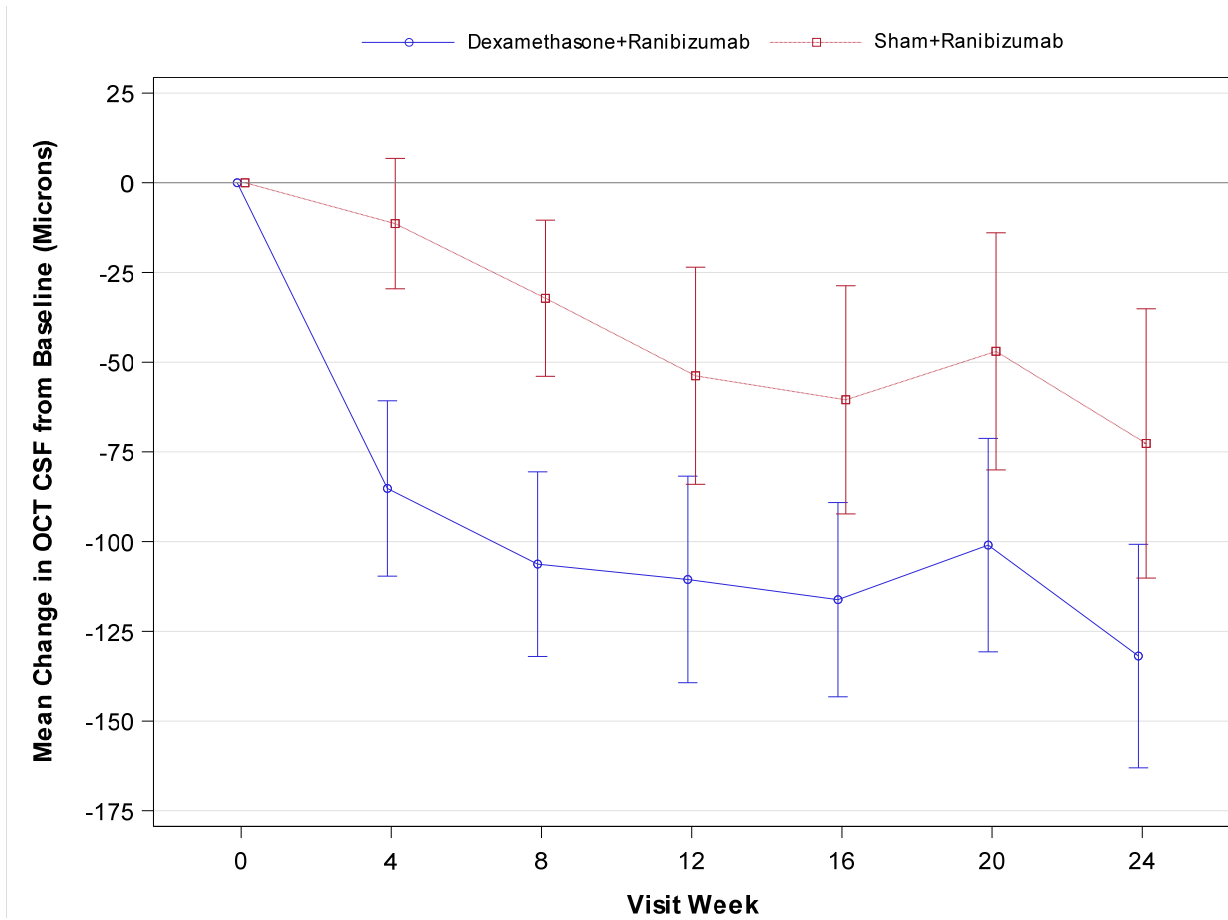

| No. of eyes                | Visit Week |    |    |    |    |    |    |
|----------------------------|------------|----|----|----|----|----|----|
|                            | 0          | 4  | 8  | 12 | 16 | 20 | 24 |
| Dexamethasone +Ranibizumab | 38         | 36 | 38 | 36 | 34 | 35 | 36 |
| Sham +Ranibizumab          | 38         | 36 | 38 | 38 | 37 | 34 | 38 |

### b) Not Improved

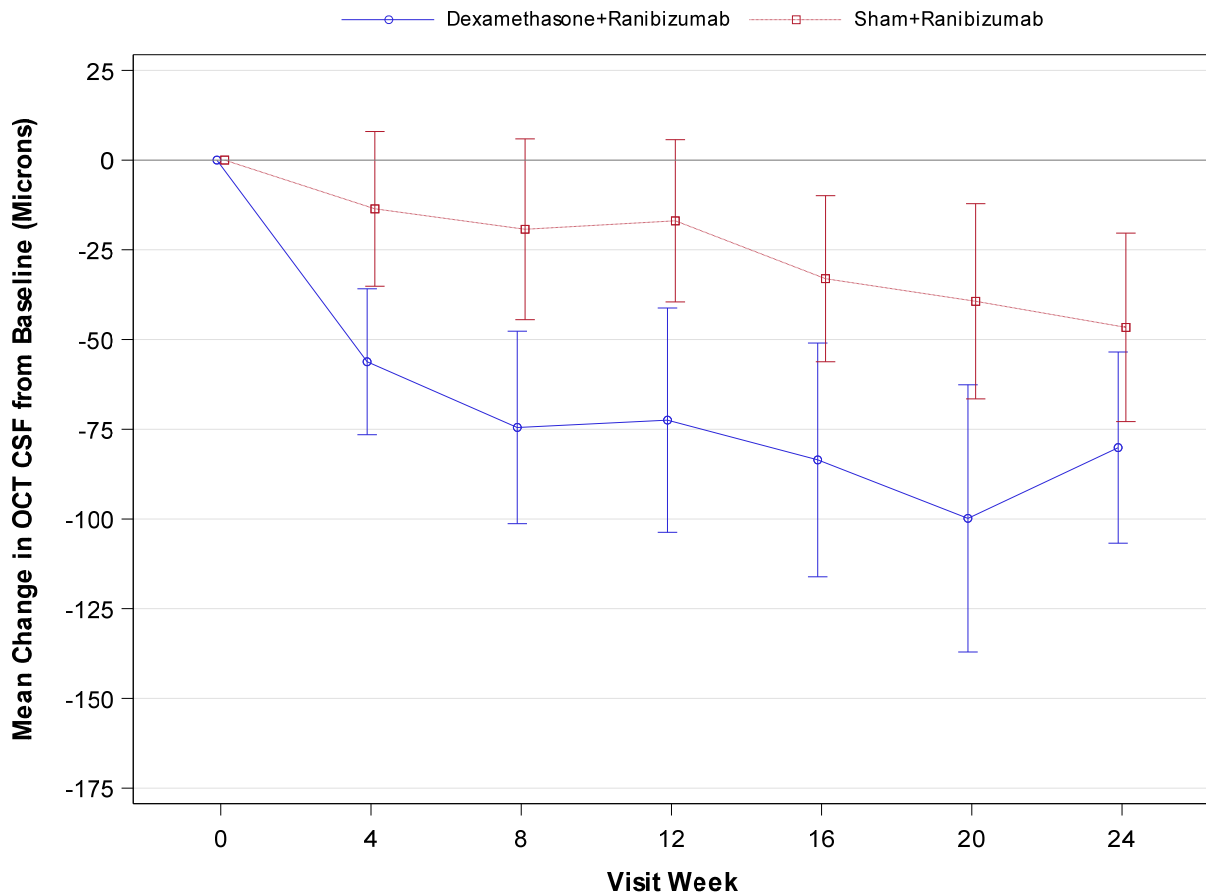

| No. of eyes                | Visit Week |    |    |    |    |    |    |
|----------------------------|------------|----|----|----|----|----|----|
|                            | 0          | 4  | 8  | 12 | 16 | 20 | 24 |
| Dexamethasone +Ranibizumab | 27         | 26 | 26 | 26 | 26 | 23 | 26 |
| Sham +Ranibizumab          | 26         | 24 | 25 | 25 | 25 | 26 | 26 |

OCT, optical coherence tomography; CSF, central subfield thickness

Error bars indicate 95% confidence intervals. Outlying values were truncated to 3 standard deviations from the mean. A) OCT central subfield thickness improved during run-in phase; B) OCT central subfield thickness not improved during run-in phase.  $P = .15$  for the interaction between treatment and improvement in OCT during run-in phase.
